1 **MicroRNA-155 regulates osteogenesis and bone mass phenotype via targeting**  
2 **S1PR1 gene**

3

4 Zhichao Zheng<sup>1,2,#</sup>, Lihong Wu<sup>1,#</sup>, Zhicong Li<sup>1,#</sup>, Ruoshu Tang<sup>1</sup>, Hongtao Li<sup>3</sup>, Yinyin  
5 Huang<sup>1</sup>, Zhitong Ye<sup>1</sup>, Dong Xiao<sup>4,5</sup>, Xiaolin Lin<sup>4,5</sup>, Gang Wu<sup>6,7\*</sup>, Richard T Jaspers<sup>2,\*</sup>,  
6 Janak L. Pathak<sup>1,\*</sup>

7

8 <sup>1</sup>Affiliated Stomatology Hospital of Guangzhou Medical University, Guangdong  
9 Engineering Research Center of Oral Restoration and Reconstruction, Guangzhou  
10 Key Laboratory of Basic and Applied Research of Oral Regenerative Medicine,  
11 Guangzhou, Guangdong 510182, China

12 <sup>2</sup>Laboratory for Myology, Department of Human Movement Sciences, Faculty of  
13 Behavioural and Movement Sciences, Vrije Universiteit Amsterdam, Amsterdam  
14 Movement Sciences, Amsterdam 1081 HZ, The Netherlands

15 <sup>3</sup>State Key Laboratory of Respiratory Diseases, National Clinical Research Center for  
16 Respiratory Diseases, Guangzhou Institute of Respiratory Health, the First Affiliated  
17 Hospital of Guangzhou Medical University, Guangzhou, Guangdong 510230, China

18 <sup>4</sup>Guangdong Provincial Key Laboratory of Cancer Immunotherapy Research and  
19 Guangzhou Key Laboratory of Tumour Immunology Research, Cancer Research  
20 Institute, School of Basic Medical Science, Southern Medical University, Guangzhou  
21 510515, China

22 <sup>5</sup>Institute of Comparative Medicine & Laboratory Animal Center, Southern Medical  
23 University, Guangzhou 510515, China

24 <sup>6</sup>Department of Oral and Maxillofacial Surgery/Pathology, Amsterdam UMC and  
25 Academic Center for Dentistry Amsterdam (ACTA), Amsterdam Movement Science,  
26 Vrije Universiteit Amsterdam, Amsterdam, the Netherlands.

27 <sup>7</sup>Department of Oral Cell Biology, Academic Center for Dentistry Amsterdam  
28 (ACTA), University of Amsterdam and Vrije Universiteit Amsterdam, Amsterdam, the  
29 Netherlands.

30

31 #These authors contributed equally to this work

32 \* Corresponding authors

33 Janak L. Pathak,

34 Email: [j.pathak@gzhmu.edu.cn](mailto:j.pathak@gzhmu.edu.cn)

35 Richard T Jaspers

36 Email: [r.t.jaspers@vu.nl](mailto:r.t.jaspers@vu.nl)

37 Gang Wu

38 Email: [g.wu@acta.nl](mailto:g.wu@acta.nl)

39

40

41

42

43

44

45

46

47

48

49

50

51

52

53

54

55

56

57

58

59 **Abstract**

60 MicroRNA-155 (miR155) is overexpressed in various inflammatory diseases and  
61 cancer, in which bone resorption and osteolysis are frequently observed. However, the  
62 role of miR155 on osteogenesis and bone mass phenotype is still unknown. Here, we  
63 report a low bone mass phenotype in the long bone of miR155-Tg mice compared  
64 with control mice. In contrast, miR155-KO mice showed a high bone mass phenotype.  
65 miR155-KO mice showed robust bone regeneration in the ectopic and orthotopic  
66 model, but miR155-Tg mice showed compromised bone regeneration compared with  
67 the control mice. Similarly, the osteogenic differentiation potential of bone marrow  
68 stromal stem cells (BMSCs) from miR155-KO mice was robust and miR155-Tg was  
69 compromised compared with that of control mice. Moreover, miR155 knockdown in  
70 BMSCs from control mice showed higher osteogenic differentiation potential,  
71 supporting the results from miR155-KO mice. TargetScan analysis predicted S1PR1  
72 as a target gene of miR155, which was further confirmed by luciferase assay and  
73 miR155 knockdown. S1PR1 overexpression in BMSCs robustly promoted osteogenic  
74 differentiation without affecting cell viability and proliferation. Thus, miR155 showed  
75 a catabolic effect on osteogenesis and bone mass phenotype via interaction with the  
76 S1PR1 gene, suggesting inhibition of miR155 as a potential strategy for bone  
77 regeneration and bone defect healing.

78

79 **Keywords:** miR155, osteogenesis, bone mass phenotype, S1PR1, cell viability

80

81

82

83

84

85

86

87

## 88 **Introduction**

89 MicroRNAs (miRNAs) are a class of endogenous non-coding RNAs with 18-22  
90 nucleotides length that bind to the 3'-untranslated region of the target gene and  
91 regulate the target gene expression (1). miRNAs regulate cell functions such as  
92 growth, differentiation, and energy metabolism by silencing the target gene via  
93 degradation or translational repression (1, 2). Moreover, miRNAs are also involved in  
94 the pathophysiology of various inflammatory diseases and cancers (3-5). Certain  
95 miRNAs had been reported to regulate osteogenesis and bone homeostasis (5, 6).  
96 MicroRNA-155 (miR155) is one of the best conserved and multifunctional miRNAs  
97 that regulate several biological processes and diseases such as tumorigenesis,  
98 cardiovascular disease, kidney diseases, etc (7-10). miR155 is upregulated in  
99 inflammatory diseases and cancers, including periodontitis, lung cancer, liver cancer,  
100 and breast cancer (11-14). Systemic bone loss is frequently observed in patients with  
101 inflammatory diseases and cancers (15, 16). However, the role of miR155 on  
102 osteogenesis and bone homeostasis is still unclear.

103 Induced osteoclasts formation/activity and compromised osteogenic differentiation  
104 disrupt bone homeostasis causing bone loss (17, 18). Osteoclasts formation and  
105 activity are induced during inflammation and cancer (19, 20). miR155 had been  
106 reported to induce osteoclastogenesis (21). miR155 knockout (miR155-KO) mice  
107 exhibit reduced local bone destruction in arthritis attributed to reduced generation of  
108 osteoclasts (22). Osteogenic differentiation of precursor cells results in bone  
109 formation and is the key anabolic event of bone homeostasis. Reduced osteogenic  
110 differentiation of precursor cells causes low bone mass phenotype increasing the risk  
111 of fracture. Osteogenesis is also a key biological process of bone tissue engineering.  
112 Various miRNAs targeted approaches had been developed to promote bone  
113 regeneration and bone defect healing during bone tissue engineering (23). The role of  
114 miR155 on osteogenic differentiation and bone regeneration is rarely investigated.  
115 Compromised osteogenesis and low bone mass phenotype are frequently observed in  
116 patients with inflammatory diseases and cancers (24, 25). Similarly, effective bone

117 regeneration and bone defect healing are also key challenges in patients with  
118 inflammatory diseases. miR155 targets multiple genes to regulate the pathophysiology  
119 of a specific disease in a cell-type-specific manner (26). Sphingosine 1-phosphate  
120 receptor-1 (S1PR1) is one of the target genes of miR155 (27), which has been  
121 reported to positively regulate osteogenic differentiation of precursor cells (28, 29).  
122 Therefore, it is wise to explore the involvement of S1PR1 in miR155-mediated effect  
123 on osteogenesis.

124 In this study, we aimed to analyze the effect of different levels of miR155 on  
125 osteogenesis and bone mass phenotype using miR155 transgenic (miR155-Tg) and  
126 miR155-KO mice. This study also investigated the role of miR155 target gene S1PR1  
127 on osteogenic differentiation of BMSCs. We found a catabolic effect of miR155 on  
128 osteogenesis and bone mass phenotype via targeting the S1PR1 gene.

129

130

## 131 **Results**

### 132 **miR155-Tg mice showed a low bone mass phenotype**

133 Micro-CT images showed fewer and thinner trabeculae in miR155-Tg mice femur  
134 compared to control mice (Fig. 1A). Trabecular bone parameter BV/TV, BMD, Tb.N,  
135 and Tb.Th were significantly reduced in miR155-Tg mice compared to control mice  
136 (Fig. 1B-1E). In miR155-Tg mice Tb.Sp was significantly increased compared to  
137 control mice (Fig. 1F). These results indicate the low bone mass phenotype in  
138 miR155-Tg mice.

139

### 140 **miR155-KO mice showed a high bone mass phenotype**

141 Micro-CT images showed robustly dense and interconnected trabeculae in  
142 miR155-KO mice compared to control mice (Fig. 2A). The trabecular bone  
143 parameters BV/TV, BMD, Tb.N in miR155-KO mice were 2-, 2.69-, 1.83-,  
144 respectively, compared to control mice (Fig. 2B-2D). While Tb.Th was not  
145 significantly changed (Fig. 2E). Tb.Sp in miR155-KO mice was significantly reduced

146 compared to control mice (Fig. 2F). These results indicate the high bone mass  
147 phenotype of miR155-KO mice. miR155-KO and miR155-Tg showed an opposite  
148 trend of bone mass phenotype and trabecular bone parameters (Fig. 1 and 2),  
149 suggesting the role of miR155 in bone homeostasis regulation.

150

### 151 **Ectopic bone regeneration was inhibited in miR155-Tg mice while increased in** 152 **miR155-KO mice**

153 A bone regeneration study was conducted to investigate whether the bone  
154 regeneration potential is altered in miR155-Tg and miR155-KO mice. BMP2-loaded  
155 collagen membranes were implanted in mice ectopically to confirm the bone  
156 regeneration potential in the ectopic site of miR155-Tg, miR155-KO, and control  
157 mice. Micro-CT images showed very less bone volume in collagen membrane  
158 transplanted in miR155-Tg mice compared to that of control mice (Fig. 3A). The  
159 miR155-Tg group showed significantly reduced BV/TV and Tb.N in newly formed  
160 bone compared to the control group (Fig. 3B). Tb.Sp was increased in the miR155-Tg  
161 group compared to the control group (Fig. 3B). In contrast, ectopic bone regeneration  
162 was significantly increased in the miR155-KO group compared to the control group  
163 (Fig. 3C). Newly formed bone BV/TV and Tb.N in the miR155-KO group were  
164 increased by 6.12-, and 5.64-fold respectively compared to the control group (Fig.  
165 3D). The Tb.Sp was significantly reduced in the miR155-KO group compared control  
166 group (Fig. 3J). These results indicate a catabolic effect of miR155 on bone  
167 regeneration.

168

### 169 **miR155-KO mice showed enhanced bone regeneration in an orthotopic model**

170 To further confirm the catabolic effect of miR155 on bone regeneration, we adopted a  
171 calvarial bone defect healing model in miR155-KO mice. Micro-CT images showed  
172 more newly formed bone in the defect area of the miR155-KO group compared to the  
173 control group (Fig. 4A). Newly formed bone parameter analysis showed higher  
174 BV/TV (3.49-fold), and Tb.N (2.85-fold) in the miR155-KO group compared to the

175 control group (Fig. 4B and 4C). There was no significant difference in Tb.Th and  
176 Tb.Sp between the groups (Fig. 4D, 4E). These results indicate the anabolic effect of  
177 miR155 knockout on bone regeneration.

178

### 179 **miR155 influences the osteogenic differentiation of BMSCs**

180 To further confirm the regulatory role of miR155 on osteogenesis, we analyzed the  
181 osteogenic differentiation potential BMSCs isolated from miR155-Tg, miR155-KO,  
182 and control mice. Mineralized matrix deposition potential in BMSCs from  
183 miR155-TG mice was prominently reduced compared to control mice (Fig. 5A and  
184 5B). Similarly, protein level expressions of osteogenic markers ALP and Runx2 in  
185 BMSCs from R155-Tg mice were reduced compared to that of control mice (Fig. 5C).  
186 These results indicate the compromised osteogenic differentiation potential of BMSCs  
187 from miR155-Tg mice. In contrast, BMSCs from miR155-KO mice showed robustly  
188 higher matrix mineralization potential compared to that of control mice (Fig. 5D and  
189 5E). The protein level expressions of osteogenic markers ALP were enhanced in  
190 BMSCs from miR155-KO (Fig. 5F). These results demonstrated the catabolic effect  
191 of miR155 in osteogenic differentiation.

192

### 193 **Knockdown of miR155 induced osteogenic differentiation of BMSCs**

194 Matrix mineralization was robustly increased in the miR155 sponge group compared  
195 to the negative control group (Fig. 6A and 6B). miR155 was knockdown in BMSCs to  
196 further confirm the role of miR155 level in osteogenic differentiation. miR155 sponge  
197 lentivirus treatment significantly reduced the expression of miR155 in BMSCs (Fig.  
198 6C), indicating the successful knockdown of miR155. Similarly, the protein level  
199 expression of osteogenic markers ALP and Runx2 was robustly upregulated in the  
200 miR155 sponge group compared to the negative control group (Fig. 6E). These results  
201 showed a catabolic effect of miR155 on osteogenic differentiation of precursor cells.

202

### 203 **miR155 targets the S1PR1 gene to regulate osteogenic differentiation of BMSCs.**

204 TargetScan predicted S1PR1 as a target gene of miR155 (Fig. 7A). Luciferase reporter  
205 gene assay was performed to analyze the miR155 and S1PR1 gene interaction (Fig.  
206 7B). Our results showed that miR155 directly binds to the 3'UTR of the S1PR1 (Fig.  
207 7B). miR155 robustly enhanced the protein level expression of the S1PR1 gene in  
208 BMSCs (Fig. 7C), confirming the interaction of miR155 and the S1PR1 gene. S1PR1  
209 transfection in BMSCs robustly enhanced the matrix mineralization (Fig. 7D and 7E).  
210 The protein level expression of S1PR1 was enhanced in lentivirus-mediated S1PR1  
211 overexpressed BMSCs (Fig. 7F). This result indicates the efficacy of lentivirus-based  
212 S1PR1 overexpression in BMSCs. The protein level expression of ALP and Runx2  
213 was increased in S1PR1 overexpressed BMSCs (Fig. 7F). S1PR1 overexpression in  
214 BMSCs by lentivirus did not affect cell viability and proliferation (Fig. 7G). These  
215 results indicate that the miR155 targets the S1PR1 gene to regulate osteogenic  
216 differentiation of BMSCs.

217

## 218 **Discussion**

219 Differentiation of mesenchymal stem cells to osteoblasts is a vital event of bone  
220 regeneration. Differentiated osteoblasts deposit mineralized matrix and contribute to  
221 new bone formation. Various miRNAs had been reported to regulate osteogenesis and  
222 bone mass phenotype (23). In this study, miR155-Tg mice showed compromised bone  
223 regeneration and low bone mass phenotype. In contrast, miR155-KO mice showed  
224 improved bone regeneration and a higher bone mass phenotype. BMSCs from  
225 miR155-Tg and miR155-KO mice showed compromised and robust osteogenic  
226 differentiation potential, respectively. miR155 silencing also promoted osteogenic  
227 differentiation potential in BMSCs. These results indicate a catabolic effect of  
228 miR155 on bone regeneration and bone mass phenotype. Knockdown of miR155 in  
229 BMSCs robustly enhanced the protein level expression of S1PR1 and osteogenic  
230 regulator Runx2, indicating S1PR1 as a target gene of miR155 in BMSCs to regulate  
231 osteogenic differentiation. S1PR1 overexpression in BMSCs enhanced Runx2  
232 expression and osteogenic differentiation of BMSCs indicating the regulatory role of



233 miR155-S1PR1 interaction on osteogenesis (Fig. 8).

234 miRNAs/anti-miRNAs have been used for bone tissue engineering (23). MiR26a  
235 (30), anti-miR31 (31), anti-miR34a (32), miR135 (33), anti-miR138 (34),  
236 anti-miR146a (35), miR148a (36), anti-miR221 (37), anti-miR-3555p (38) had shown  
237 anabolic effect on osteogenic differentiation of precursor cells and bone defect healing.  
238 Most of the miRNAs/anti-miRNAs promote bone regeneration via activation of  
239 osteogenic master regulator Runx2 (23). In this study, miR155 overexpression showed  
240 a catabolic effect on osteogenesis and bone mass phenotype. Interestingly, knockout  
241 or knockdown of miR155 showed an anabolic effect on osteogenesis and bone defect  
242 healing. Runx2 was involved in the miR155-mediated regulation of osteogenic  
243 differentiation of BMSCs. miR155 had been reported to inhibit osteogenesis of  
244 MC3T3-E1 cells via SMAD5 downregulation (39). miR155 inhibits BMP9-induced  
245 osteogenic differentiation of precursor cells via downregulation of BMP signaling  
246 (40). Qu et al. revealed the miR155 inhibition could alleviate suppression of the  
247 osteogenic differentiation of human BMSCs under the condition of under high  
248 glucose and free fatty acids by targeting SIRT1 (41). Our results from miR155-Tg  
249 mice on inhibition of osteogenesis are in accordance with the findings from the  
250 literature (39, 40). To our knowledge, this is the first study to report the anabolic  
251 effect of miR155 knockout or knockdown on osteogenic differentiation of precursor  
252 cells. Our results suggest the potential application of anti-miR155 on bone  
253 regeneration and bone tissue engineering application.

254 Anti-miR155 oligonucleotides and antagomir have been designed for various  
255 cancer treatments (42, 43). Small molecule-based cyclic peptidomimetics had shown  
256 an inhibitory effect on miR155 biogenesis(44). MLN4924 is an inhibitor of the  
257 NEDD8-activating enzyme. MLN4924 decreases the binding of NF- $\kappa$ B to the miR155  
258 promoter and downregulates miR155 in AML cells (45). Since, knockdown of  
259 miR155 robustly promoted the osteogenesis and bone mass phenotype, anti-miR155  
260 or miR155 inhibitor could apply for bone tissue engineering application as well as the  
261 treatment of low bone mass phenotype. However, the osteoinductive potential of

262 already available anti-miR155 or miR155 inhibitors should be tested using in vitro  
263 and in vivo models to prove this hypothesis.

264 miR155 targets different genes in different cells to regulate the cell type-specific  
265 functions (46-49). S1PR1, a target gene of miR155, is regulated during various  
266 physiological and pathological conditions (49, 50). In this study, miR155 inhibition  
267 upregulated S1PR1 protein expression. Overexpression of S1PR1 robustly promoted  
268 Runx2 expression and osteogenic differentiation of BMSCs. Gu Y et al. reported that  
269 miR155 inhibits osteogenic differentiation of precursor cells via inhibiting SMAD5  
270 (39). Higashi K et al. reported SMAD1/5/8 as downstream signaling of S1PR1/S1PR2  
271 to induce Runx2 expression in osteoblast (29). Reports from the literature and results  
272 of this study indicate that miR155 targets the S1PR1 gene to inhibit Runx2 expression  
273 thereby reducing bone regeneration and bone mass.

274 Since miR155 is upregulated in various cancer including hematological cancers  
275 (43). Hematological cancer mainly affects bone marrow that is the dwelling of bone  
276 precursor cells. Hematological cancers are associated with bone loss and fracture of  
277 vertebrae and long bone. Breast and lung cancer are frequently metastasized to bone  
278 and cause osteolysis (51, 52). Cancer/cancer metastasis-induced bone loss-mediated  
279 fracture is a serious clinical problem. However, the role of upregulated levels of  
280 miR155 on cancer/cancer metastasis-related reduced bone mass is still unclear.  
281 Moreover, the prevention of cancer/cancer metastasis-induced bone loss is a huge  
282 challenge for clinicians. Since anti-miR155 is already proven to be beneficial for  
283 cancer treatment and miR155 knockdown promotes bone regeneration, anti-miR155  
284 could treat cancer as well as cancer-induced bone loss as a killing two birds with one  
285 stone concept. However, future in vitro and in vivo studies are needed to confirm this  
286 hypothesis.

287 miR155 is overexpressed and plays a key role in the pathophysiology of  
288 inflammatory diseases including autoimmune arthritis, osteoarthritis, periodontitis (11,  
289 22, 53). An elevated level of miR155 in arthritis promotes M1 macrophage  
290 polarization and inflammation (53). Prevention of bone loss in inflammatory diseases

291 using currently available therapeutic approaches is not satisfactory. Moreover,  
292 inflammation impedes bone regeneration thereby causing the failure of bone tissue  
293 engineering approaches. Since anti-miR155 has anti-inflammatory (54) and bone  
294 regenerative potential, anti-miR155 could be potential therapeutic to promote bone  
295 regeneration even in inflammatory conditions.

296 This study used both miR155-Tg and miR155-KO mice to investigate the role of  
297 miR155 on osteogenesis and bone mass phenotype. Bone regeneration both in ectopic  
298 and orthotopic models confirmed the regulatory role of miR155 in bone regeneration.  
299 miR155 silenced and S1PR1 overexpressed BMSCs further confirmed the S1PR1 as a  
300 target gene of miR155 to regulate Runx2 expression during osteogenesis. The  
301 limitation of this study is that we did not analyze the downstream signaling pathway  
302 of S1PR1 that regulates Runx2 expression in BMSCS.

303 miR155 showed a catabolic effect on osteogenesis and bone mass via targeting S1PR1.  
304 Our results suggest miR155 as a potential target to promote bone regeneration and  
305 higher bone mass. Since miR155 is overexpressed in inflammatory diseases and  
306 anti-miR155 has shown anti-inflammatory potential, the miR155 inhibitors could be  
307 potential therapeutics to promote bone regeneration even in inflammatory conditions.

308

## 309 **Materials and methods**

### 310 **Mice**

311 miR155-KO mice were purchased from the Jackson Laboratory (Stock No. 007745).  
312 miR155-Tg mice were constructed as described in our previous reports (55). The  
313 C57BL/6J wildtype mice, as the control mice of miR155-KO mice, were purchased  
314 from Guangdong medical laboratory animal center. While the FVB mice were  
315 littermate control of miR155-Tg mice. The blinded evaluation was used for mice  
316 assignments and analysis. The animal experiment was conducted in accordance with  
317 the guidelines approved by the Institutional Animal Care and Use Committee of the  
318 First Affiliated Hospital of Guangzhou Medical University, Guangzhou, China  
319 (2017-078).

320

### 321 **Bone phenotype analysis**

322 Bone phenotype analysis was performed in 8 weeks old male mice (8 mice/group)  
323 using micro-CT. Mice were anesthetized using isoflurane (RWD life science CO.,  
324 China), followed by cervical dislocation. Femur with distal growth plate was collected  
325 and fixed in 10% buffered formalin. micro-CT scanning was performed to evaluate  
326 bone phenotype using Bruker Sky1172 Skyscan (Kontich, Belgium). A total of 100  
327 slices (1 mm) below the distal growth plate of the femurs was measured for 3D  
328 reconstruction and quantification of trabecular bone as described previously (56). The  
329 X-ray tube was operated at 96 kV and 65  $\mu$ A using a 0.5 mm Al filter with a  
330 resolution of 7.93  $\mu$ m pixels. Scanning was performed by 180° rotation around the  
331 vertical axis, camera exposure time of 1300 ms, rotation step of 0.6°, frame averaging  
332 of 2, and random movement of 10. 3D images were made using CTvox software  
333 (Skyscan, Kontich, Belgium). Data viewer software (Skyscan, Kontich, Belgium) was  
334 used for images and linear analysis. Relative bone formation parameters including  
335 bone volume/total volume (BV/TV), bone mineral density (BMD), trabecular number  
336 (Tb.N), trabecular thickness (Tb.Th), and trabecular separation (Tb.Sp) were  
337 analyzed.

338

### 339 **Ectopic grafting of collagen membrane**

340 Collagen membrane ZH-BIO (China) with 5 mm diameter and 1 mm thickness were  
341 osteogenically functionalized by loading 10  $\mu$ L of 0.3 mg/mL BMP2 solution.  
342 BMP2-loaded collagen membranes were implanted in the subcutaneous pockets of  
343 miR155-Tg, miR155-KO, and respective control mice. Eight-week-old male mice  
344 with 20-22 g body weight (4 mice/group, 1 membranes/mouse) were used for this  
345 study. The subcutaneous transplantation of collagen membrane was performed as  
346 described previously (57). After 18 days of transplantation, mice were euthanized by  
347 isoflurane, collagen membrane was collected, and further analyzed for newly formed  
348 bone using micro-CT.

349

### 350 **Mice calvaria bone defect healing**

351 Eight-week-old male mice with 20-22 g body weight (3 mice/group, 2 defects/mouse)  
352 were used for the calvaria bone defect healing study. The calvaria bone defects model  
353 was established as previous reports (58, 59). Surgery was performed under anesthesia  
354 with pentobarbital sodium (50 mg/kg) and the body temperature was maintained at 37°C  
355 with a heated platform. After exposure of the cranium surface through a skin incision,  
356 a circular and full-thickness bone defect with a 1 mm diameter was generated across  
357 the two sides of the sagittal suture using a trephine drill. The bone fragments were  
358 taken out. After gentamicin flushing, the incisions were sewed up. After 1 month, the  
359 calvaria bones were collected and the healing level was analyzed by micro-CT.

360

### 361 **The isolation of primary BMSCs**

362 Euthanized transgenic mice and control male mice (5-6 weeks old) were immersed  
363 into 75% ethanol for 5 min. The femurs and tibia were acquired. Primary BMSCs  
364 were isolated and expanded as described previously (60). In brief, bone marrow was  
365 flushed out from the tibia and femurs and disturbed into small pieces. Cells were  
366 collected by centrifugation and plated into flasks and allowed to adhere for 24 h.  
367 Nonadherent cells were washed, and culture was continued in DMEM supplemented  
368 with 10% non-heat inactivated FBS and 1% penicillin/streptomycin. The cells were  
369 cultured in a 5% CO<sub>2</sub> incubator maintaining a humid atmosphere. Cells were  
370 trypsinized from 80% confluent culture and passaged. The primary BMSCs in  
371 passages 1-3 were used throughout the study.

372

### 373 **Analysis of target gene of miR155**

374 TargetScan software was used to predict the target gene of miR155. TargetScan  
375 predicted S1PR1 as a possible target gene of miR155.

376

### 377 **Plasmid construction and lentivirus preparation**

378 The S1PR1 3'UTR sequences and mutant sequences (200 bp upstream and 200 bp  
379 downstream of the binding site from NM\_007901.5 transcript) were synthesized and  
380 cloned into wildtype plasmid pmirGLO Dual-Luciferase miRNA Target Expression  
381 Vector (Promega, USA) by Generay (China). We created S1PR1 3'UTR and S1PR1  
382 mutant 3'UTR plasmids for luciferase assay. The LV242 S1PR1 and control LV242  
383 plasmid were purchased from Genecopiedia (USA). miR155 negative control (NC)  
384 and miR155 sponge plasmids were purchased from OBIO (China).

385 For lentiviral transduction, HEK293T cells were co-transfected with expression  
386 plasmids (miR155 NC, miR155 sponge, LV242, or LV242 S1PR1) with the packaging  
387 plasmids pMD2.VSVG, pMDLg/pRRE, and pRSV-REV using EZ trans transfection  
388 reagent (Shanghai life iLab BioTechnology Co., LTD, China). After 48 h, fresh  
389 lentiviral supernatant was collected and used for infection. BMSCs cells were  
390 expanded to 60% confluence prior to lentiviral infection. After infection for 10 h, cells  
391 were washed and allowed to recover for 24 h and used for subsequent experiments.  
392 miR155 sponge efficacy was analyzed by RT-qPCR. S1PR1 overexpression efficacy  
393 was analyzed by western blot analysis.

394

### 395 **Luciferase assay**

396 Luciferase assay was performed for further confirmation of S1PR1 as a target gene of  
397 miR155. S1PR1 3'UTR (100 ng) with NC (50 nM), S1PR1 3'UTR (100 ng) with  
398 miR155 (50 nM), and the S1PR1 mutant 3'UTR plasmid (100 ng) with miR155 (50  
399 nM) were co-transfected into HEK293T cells by lipofectamine 2000 (Thermo Fisher  
400 Scientific Inc. USA). After 48 h, the luciferase assay was performed according to the  
401 manufacture's instruction using Luc-Pair™ Duo-Luciferase Assay Kit 2.0  
402 (Genecopiedia, USA). In brief, the cells were lysed and incubated with 100  $\mu$ L Fluc  
403 work solution for 5 min, the fluorometric measurement was performed by Varioskan®  
404 Flash (Thermo Fisher, USA). The lysis solution was added with 100  $\mu$ L Rluc,  
405 incubated for 5 min, and the fluorometric value was measured.

406

407 **Alizarin red staining**

408 BMSCs (28,000 cells/well) were seeded at 48 well culture plate and cultured with  
409 osteogenic medium (50 µg/mL vitamin C, 0.01 µM dexamethasone, and 10 mM  
410 β-glycerophosphate). Then the cells were fixed with paraformaldehyde and stained  
411 with Alizarin Red S solution (1%, pH 4.2) (Solarbio life sciences, China) for 10 min.  
412 The staining was visualized under stereomicroscope Leica EZ4HD (Leica, Germany).  
413 For quantitative analysis, the alizarin red-stained mineralized matrix was dissolved  
414 with 200 µL 10% hexadecylpyridinium chloride monohydrate for 1 h, and the  
415 supernatant was collected. The optical density of the supernatant (100 µL) was  
416 measured by a microplate reader at 562 nm.

417

418 **Immunoblotting**

419 Cells were lysed by using RIPA Buffer (CWBio, China) containing protease inhibitor  
420 to extract total protein. Total protein (20 µg) was added to 10% SDS-polyacrylamide  
421 gel. The protein was transferred to PVDF membranes (Millipore, USA) after  
422 electrophoresis and blocked for 1 h with blocking buffer (Beyotime, China). Then  
423 PVDF membranes were incubated with the primary antibodies including ALP (CST,  
424 USA, 1:3,000), Runx2 (CST, USA, 1:2,000), S1PR1 (Abcam, UK, 1:2,000), and  
425 GAPDH (CST, USA, 1:5,000) overnight at 4°C. The membranes were further  
426 incubated with horseradish peroxidase-conjugated secondary antibody for 1 h and  
427 reacted with ECL (Millipore, USA). Finally, the photographs were taken by the  
428 C-Digit system (Agilent, USA).

429

430 **RT-qPCR**

431 The microRNAs were extracted from BMSCs with the MolPure<sup>®</sup> Cell/Tissue miRNA  
432 Kit (Yeasen, China) as the manufacture's instructions. The microRNA was further  
433 reversed by Tailing reaction using miRNA 1st strand cDNA synthesis kit (Accurate  
434 biology, China). In brief, 3.75 µL microRNA, 5 µL 2× miRNA RT Reaction Solution,  
435 1.25 µL miRNA RT Enzyme Mix were incubated at 37°C for 1 h, 85°C for 5 min.

436 RT-qPCR was performed using SYBR<sup>®</sup> Green Premix Pro Taq HS qPCR Kit  
437 (Accurate biology, China) on an AriaMx Real-time quantitative PCR machine  
438 (Agilent, USA). The PCR reaction conditions were 95°C for 30 s, followed by 40  
439 cycles at 95°C for 5 s and 60°C for 30 s. The fold change relative to the control  
440 group was measured by the  $2^{-\Delta\Delta Ct}$  method. The primer used for miR155 detection was  
441 TAATGCTAATTGTGATAGGGGT.

442

#### 443 **Prestoblue cell viability assay**

444 Cell viability was analyzed using PrestoBlue<sup>™</sup> cell viability reagent (Thermo Fisher,  
445 USA). BMSCs ( $4 \times 10^3$  cells/well) were seeded into 96 well culture plates. After 1, 3,  
446 and 5 days, the medium was removed and replaced with a cell viability detection  
447 medium according to the manufacturer's instructions. After 2 h, the OD value was  
448 measured by a microplate reader at 570 nm with a reference wavelength of 600 nm.

449

#### 450 **Statistical analysis**

451 Data are expressed as mean $\pm$ SD. Statistical analysis was performed with t-tests for  
452 comparison of two groups.  $p < 0.05$  was considered as a significant difference.

453

#### 454 **Acknowledgments**

455 This project was funded by National Natural Science Foundation of China  
456 (82150410451), the General Guiding Project of Guangzhou (20201A011105), the  
457 Medical Scientific Research Foundation of Guangdong Province (B2020027), the  
458 Undergraduate Science and Technology Innovation Project of Guangzhou Medical  
459 University (2020A049), and High-level University Construction Funding of  
460 Guangzhou Medical University (02-412-B205002-1003017 and 06-410-2106035).

461

#### 462 **Competing interest**

463 All authors declare no conflict of interests.

464



465 **Data availability**

466 Source data files have been provided for Figures 1-7 as Figure 1 source data-1, Figure  
467 2 source data-2, Figure 3 source data-3, Figure 4 source data-4, Figure 5 source data-5,  
468 Figure 6 source data-6, Figure 7 source data-7. And the the western blot raw data was  
469 provided as source data-8.

470

471

472

473 **References**

474 1. Gareev I, Beylerli O, Yang G, Sun JX, Pavlov V, Izmailov A, et al. The current state of  
475 MiRNAs as biomarkers and therapeutic tools. *Clin Exp Med.* 2020;20(3):349-59.

476 2. Wang F, Liang R, Tandon N, Matthews ER, Shrestha S, Yang J, et al. H19X-encoded  
477 miR-424(322)/-503 cluster: emerging roles in cell differentiation, proliferation, plasticity and  
478 metabolism. *Cell Mol Life Sci.* 2019;76(5):903-20.

479 3. Kumar S, Vijayan M, Bhatti JS, Reddy PH. MicroRNAs as Peripheral Biomarkers in Aging  
480 and Age-Related Diseases. *Prog Mol Biol Transl Sci.* 2017;146:47-94.

481 4. Acunzo M, Romano G, Wernicke D, Croce CM. MicroRNA and cancer--a brief overview.  
482 *Adv Biol Regul.* 2015;57:1-9.

483 5. Gao Y, Patil S, Qian A. The Role of MicroRNAs in Bone Metabolism and Disease. *Int J*  
484 *Mol Sci.* 2020;21(17).

485 6. Wang J, Liu S, Li J, Zhao S, Yi Z. Roles for miRNAs in osteogenic differentiation of bone  
486 marrow mesenchymal stem cells. *Stem Cell Res Ther.* 2019;10(1):197.

487 7. Elton TS, Selemon H, Elton SM, Parinandi NL. Regulation of the MIR155 host gene in  
488 physiological and pathological processes. *Gene.* 2013;532(1):1-12.

- 489 8. Readhead B, Haure-Mirande JV, Mastroeni D, Audrain M, Fanutza T, Kim SH, et al.  
490 miR155 regulation of behavior, neuropathology, and cortical transcriptomics in Alzheimer's  
491 disease. *Acta Neuropathol.* 2020;140(3):295-315.
- 492 9. Bala S, Csak T, Saha B, Zatsiorsky J, Kodys K, Catalano D, et al. The pro-inflammatory  
493 effects of miR-155 promote liver fibrosis and alcohol-induced steatohepatitis. *J Hepatol.*  
494 2016;64(6):1378-87.
- 495 10. Wu Q, Sun S, Li Z, Yang Q, Li B, Zhu S, et al. Tumour-originated exosomal miR-155  
496 triggers cancer-associated cachexia to promote tumour progression. *Mol Cancer.*  
497 2018;17(1):155.
- 498 11. Wu P, Feng J, Wang W. Expression of miR-155 and miR-146a in the saliva of patients  
499 with periodontitis and its clinical value. *Am J Transl Res.* 2021;13(6):6670-7.
- 500 12. Shao CC, Yang FM, Qin ZQ, Jing XM, Shu YQ, Shen H. The value of miR-155 as a  
501 biomarker for the diagnosis and prognosis of lung cancer: a systematic review with  
502 meta-analysis. *Bmc Cancer.* 2019;19(1).
- 503 13. Xin X, Lu Y, Xie S, Chen Y, Jiang X, Song S, et al. miR-155 Accelerates the Growth of  
504 Human Liver Cancer Cells by Activating CDK2 via Targeting H3F3A. *Mol Ther Oncolytics.*  
505 2020;17:471-83.
- 506 14. Pasculli B, Barbano R, Fontana A, Biagini T, Di Viesti MP, Rendina M, et al.  
507 Hsa-miR-155-5p Up-Regulation in Breast Cancer and Its Relevance for Treatment With  
508 Poly[ADP-Ribose] Polymerase 1 (PARP-1) Inhibitors. *Front Oncol.* 2020;10:1415.
- 509 15. Dimitroulas T, Nikas SN, Trontzas P, Kitas GD. Biologic therapies and systemic bone loss  
510 in rheumatoid arthritis. *Autoimmun Rev.* 2013;12(10):958-66.

- 511 16. S AMEB, Salawu A, Brown JE. Bone Health in Men with Prostate Cancer: Review Article.  
512 Curr Osteoporos Rep. 2019;17(6):527-37.
- 513 17. Kitaura H, Marahleh A, Ohori F, Noguchi T, Shen WR, Qi J, et al. Osteocyte-Related  
514 Cytokines Regulate Osteoclast Formation and Bone Resorption. Int J Mol Sci. 2020;21(14).
- 515 18. Li N, Lee WY, Lin SE, Ni M, Zhang T, Huang XR, et al. Partial loss of Smad7 function  
516 impairs bone remodeling, osteogenesis and enhances osteoclastogenesis in mice. Bone.  
517 2014;67:46-55.
- 518 19. Adamopoulos IE. Inflammation in bone physiology and pathology. Curr Opin Rheumatol.  
519 2018;30(1):59-64.
- 520 20. Roodman GD. Biology of osteoclast activation in cancer. J Clin Oncol.  
521 2001;19(15):3562-71.
- 522 21. Kagiya T, Nakamura S. Expression profiling of microRNAs in RAW264.7 cells treated with  
523 a combination of tumor necrosis factor alpha and RANKL during osteoclast differentiation. J  
524 Periodontal Res. 2013;48(3):373-85.
- 525 22. Bluml S, Bonelli M, Niederreiter B, Puchner A, Mayr G, Hayer S, et al. Essential Role of  
526 MicroRNA-155 in the Pathogenesis of Autoimmune Arthritis in Mice. Arthritis Rheum-Us.  
527 2011;63(5):1281-8.
- 528 23. Arriaga MA, Ding MH, Gutierrez AS, Chew SA. The Application of microRNAs in  
529 Biomaterial Scaffold-Based Therapies for Bone Tissue Engineering. Biotechnol J.  
530 2019;14(10):e1900084.
- 531 24. Schmidt T, Schwinge D, Rolvien T, Jeschke A, Schmidt C, Neven M, et al. Th17 cell  
532 frequency is associated with low bone mass in primary sclerosing cholangitis. Journal of

- 533 Hepatology. 2019;70(5):941-53.
- 534 25. Mann GB, Kang YC, Brand C, Ebeling PR, Miller JA. Secondary causes of low bone mass  
535 in patients with breast cancer: a need for greater vigilance. J Clin Oncol. 2009;27(22):3605-10.
- 536 26. Hsin JP, Lu Y, Loeb GB, Leslie CS, Rudensky AY. The effect of cellular context on  
537 miR-155-mediated gene regulation in four major immune cell types. Nat Immunol.  
538 2018;19(10):1137-45.
- 539 27. Xin Q, Li J, Dang J, Bian X, Shan S, Yuan J, et al. miR-155 Deficiency Ameliorates  
540 Autoimmune Inflammation of Systemic Lupus Erythematosus by Targeting S1pr1 in Fas<sup>lpr/lpr</sup>  
541 Mice. J Immunol. 2015;194(11):5437-45.
- 542 28. Sato C, Iwasaki T, Kitano S, Tsunemi S, Sano H. Sphingosine 1-phosphate receptor  
543 activation enhances BMP-2-induced osteoblast differentiation. Biochem Biophys Res  
544 Commun. 2012;423(1):200-5.
- 545 29. Higashi K, Matsuzaki E, Hashimoto Y, Takahashi-Yanaga F, Takano A, Anan H, et al.  
546 Sphingosine-1-phosphate/S1PR2-mediated signaling triggers Smad1/5/8 phosphorylation and  
547 thereby induces Runx2 expression in osteoblasts. Bone. 2016;93:1-11.
- 548 30. Wang Z, Xie Q, Yu Z, Zhou H, Huang Y, Bi X, et al. A regulatory loop containing miR-26a,  
549 GSK3beta and C/EBPalpha regulates the osteogenesis of human adipose-derived  
550 mesenchymal stem cells. Sci Rep. 2015;5:15280.
- 551 31. Deng Y, Zhou H, Zou D, Xie Q, Bi X, Gu P, et al. The role of miR-31-modified adipose  
552 tissue-derived stem cells in repairing rat critical-sized calvarial defects. Biomaterials.  
553 2013;34(28):6717-28.
- 554 32. Chen A, Wen J, Lu C, Lin B, Xian S, Huang F, et al. Inhibition of miR155p attenuates the

- 555 valvular damage induced by rheumatic heart disease. *Int J Mol Med*. 2020;45(2):429-40.
- 556 33. Xie Q, Wang Z, Zhou H, Yu Z, Huang Y, Sun H, et al. The role of miR-135-modified  
557 adipose-derived mesenchymal stem cells in bone regeneration. *Biomaterials*. 2016;75:279-94.
- 558 34. Eskildsen T, Taipaleenmäki H, Stenvang J, Abdallah BM, Ditzel N, Nossent AY, et al.  
559 MicroRNA-138 regulates osteogenic differentiation of human stromal (mesenchymal) stem  
560 cells in vivo. *Proceedings of the National Academy of Sciences of the United States of*  
561 *America*. 2011;108(15):6139-44.
- 562 35. Xie Q, Wei W, Ruan J, Ding Y, Zhuang A, Bi X, et al. Effects of miR-146a on the  
563 osteogenesis of adipose-derived mesenchymal stem cells and bone regeneration. *Sci Rep*.  
564 2017;7:42840.
- 565 36. Li KC, Lo SC, Sung LY, Liao YH, Chang YH, Hu YC. Improved calvarial bone repair by  
566 hASCs engineered with Cre/loxP-based baculovirus conferring prolonged BMP-2 and  
567 MiR-148b co-expression. *J Tissue Eng Regen Med*. 2017;11(11):3068-77.
- 568 37. Yeh CH, Jin L, Shen F, Balian G, Li XJ. miR-221 attenuates the osteogenic differentiation  
569 of human annulus fibrosus cells. *Spine J*. 2016;16(7):896-904.
- 570 38. Tome M, Lopez-Romero P, Albo C, Sepulveda JC, Fernandez-Gutierrez B, Dopazo A, et  
571 al. miR-335 orchestrates cell proliferation, migration and differentiation in human  
572 mesenchymal stem cells. *Cell Death Differ*. 2011;18(6):985-95.
- 573 39. Gu Y, Ma L, Song L, Li X, Chen D, Bai X. miR-155 Inhibits Mouse Osteoblast  
574 Differentiation by Suppressing SMAD5 Expression. *Biomed Res Int*. 2017;2017:1893520.
- 575 40. Liu H, Zhong L, Yuan T, Chen S, Zhou Y, An L, et al. MicroRNA-155 inhibits the  
576 osteogenic differentiation of mesenchymal stem cells induced by BMP9 via downregulation of

- 577 BMP signaling pathway. *International journal of molecular medicine*. 2018;41(6):3379-93.
- 578 41. Qu B, He J, Zeng Z, Yang H, Liu Z, Cao Z, et al. MiR-155 inhibition alleviates suppression  
579 of osteoblastic differentiation by high glucose and free fatty acids in human bone marrow  
580 stromal cells by upregulating SIRT1. *Pflugers Arch*. 2020;472(4):473-80.
- 581 42. Kardani A, Yaghoobi H, Alibakhshi A, Khatami M. Inhibition of miR-155 in MCF-7 breast  
582 cancer cell line by gold nanoparticles functionalized with antagomir and AS1411 aptamer. *J*  
583 *Cell Physiol*. 2020;235(10):6887-95.
- 584 43. Witten L, Slack FJ. miR-155 as a novel clinical target for hematological malignancies.  
585 *Carcinogenesis*. 2020;41(1):2-7.
- 586 44. Yan H, Zhou M, Bhattarai U, Song YB, Zheng MM, Cai JF, et al. Cyclic Peptidomimetics  
587 as Inhibitor for miR-155 Biogenesis. *Mol Pharmaceut*. 2019;16(2):914-20.
- 588 45. Khalife J, Radomska HS, Santhanam R, Huang X, Neviani P, Saultz J, et al.  
589 Pharmacological targeting of miR-155 via the NEDD8-activating enzyme inhibitor MLN4924  
590 (Pevonedistat) in FLT3-ITD acute myeloid leukemia. *Leukemia*. 2015;29(10):1981-92.
- 591 46. Woeller CF, Roztocil E, Hammond C, Feldon SE. TSHR Signaling Stimulates Proliferation  
592 Through PI3K/Akt and Induction of miR-146a and miR-155 in Thyroid Eye Disease Orbital  
593 Fibroblasts. *Invest Ophthalmol Vis Sci*. 2019;60(13):4336-45.
- 594 47. Wang Y, Zheng ZJ, Jia YJ, Yang YL, Xue YM. Role of p53/miR-155-5p/sirt1 loop in renal  
595 tubular injury of diabetic kidney disease. *J Transl Med*. 2018;16(1):146.
- 596 48. Hawez A, Al-Haidari A, Madhi R, Rahman M, Thorlacius H. MiR-155 Regulates  
597 PAD4-Dependent Formation of Neutrophil Extracellular Traps. *Front Immunol*. 2019;10:2462.
- 598 49. Li P, Weng Z, Li P, Hu F, Zhang Y, Guo Z, et al. BATF3 promotes malignant phenotype of

- 599 colorectal cancer through the S1PR1/p-STAT3/miR-155-3p/WDR82 axis. *Cancer Gene Ther.*  
600 2021;28(5):400-12.
- 601 50. Okoye IS, Czieso S, Ktistaki E, Roderick K, Coomes SM, Pelly VS, et al. Transcriptomics  
602 identified a critical role for Th2 cell-intrinsic miR-155 in mediating allergy and antihelminth  
603 immunity. *Proc Natl Acad Sci U S A.* 2014;111(30):E3081-90.
- 604 51. Pang Y, Fu Y, Li C, Wu Z, Cao W, Hu X, et al. Metal-Organic Framework Nanoparticles  
605 for Ameliorating Breast Cancer-Associated Osteolysis. *Nano Lett.* 2020;20(2):829-40.
- 606 52. Cheng X, Wei J, Ge Q, Xing D, Zhou X, Qian Y, et al. The optimized drug delivery  
607 systems of treating cancer bone metastatic osteolysis with nanomaterials. *Drug Deliv.*  
608 2021;28(1):37-53.
- 609 53. Li GS, Cui L, Wang GD. miR-155-5p regulates macrophage M1 polarization and  
610 apoptosis in the synovial fluid of patients with knee osteoarthritis. *Exp Ther Med.*  
611 2021;21(1):68.
- 612 54. Teng C, Lin C, Huang F, Xing X, Chen S, Ye L, et al. Intracellular codelivery of  
613 anti-inflammatory drug and anti-miR 155 to treat inflammatory disease. *Acta Pharm Sin B.*  
614 2020;10(8):1521-33.
- 615 55. Lin X, Qin Y, Jia J, Lin T, Lin X, Chen L, et al. MiR-155 Enhances Insulin Sensitivity by  
616 Coordinated Regulation of Multiple Genes in Mice. *PLoS Genet.* 2016;12(10):e1006308.
- 617 56. Moussa FM, Cook BP, Sondag GR, DeSanto M, Obri MS, McDermott SE, et al. The role  
618 of miR-150 regulates bone cell differentiation and function. *Bone.* 2021;145:115470.
- 619 57. Huang H, Feng J, Wismeijer D, Wu G, Hunziker EB. Hyaluronic Acid Promotes the  
620 Osteogenesis of BMP-2 in an Absorbable Collagen Sponge. *Polymers (Basel).* 2017;9(8).

621 58. Li J, Wang T, Li C, Wang Z, Wang P, Zheng L. Sema3A and HIF1alpha co-overexpressed  
622 iPSC-MSCs/HA scaffold facilitates the repair of calvarial defect in a mouse model. J Cell  
623 Physiol. 2020;235(10):6754-66.

624 59. Reyes R, Rodriguez JA, Orbe J, Arnau MR, Evora C, Delgado A. Combined sustained  
625 release of BMP2 and MMP10 accelerates bone formation and mineralization of calvaria critical  
626 size defect in mice. Drug Deliv. 2018;25(1):750-6.

627 60. Soleimani M, Nadri S. A protocol for isolation and culture of mesenchymal stem cells from  
628 mouse bone marrow. Nat Protoc. 2009;4(1):102-6.

629

630

631

632

633

634

635

636

637

638

### 639 **Figure legends**

640 **Figure 1.** miR155-Tg mice showed a low bone mass phenotype. (A) Representative  
641 micro-CT images. (B) BV/TV, (C) BMD, (D) Tb.N, (E) Tb.Th, and (F) Tb.Sp analysis.

642 Data are presented as mean±SD ,n=8. Significant difference compared to control mice,  
643 \*p<0.05, \*\*p<0.01.

644 **Figure 2.** miR155-KO mice showed a high bone mass phenotype. (A) Representative  
645 micro-CT images. (B) BV/TV, (C) BMD, (D) Tb.N, (E) Tb.Th, and (F) Tb.Sp analysis.

646 Data are presented as mean±SD , n=8. Significant difference compared to control



647 group, \* $p < 0.05$ , \*\* $p < 0.01$ , \*\*\* $p < 0.001$ .

648 **Figure 3.** Ectopic bone regeneration was inhibited in miR155-Tg mice but enhanced  
649 in miR155-KO mice. (A) Representative micro-CT images. (B) BV/TV, (C) Tb.N, (D)  
650 Tb.Th, and (E) Tb.Sp analysis. Data are presented as mean $\pm$ SD, n=4. Significant  
651 difference compared to control group, \* $p < 0.05$ , \*\*\* $p < 0.001$ .

652 **Figure 4.** A higher degree of bone regeneration was observed in the calvarial defect of  
653 miR155-KO mice. (A) Representative micro-CT images. (B) BV/TV, (C) Tb.N, (D)  
654 Tb.Th, and (E) Tb.Sp analysis. Data are presented as mean $\pm$ SD, n=6. Significant  
655 difference compared to control mice, \* $p < 0.05$ , \*\* $p < 0.01$ .

656 **Figure 5.** BMSCs from miR155-Tg mice exhibited compromised osteogenic  
657 differentiation. (A) ARS images stained at day 10 of culture, (B) ARS quantification,  
658 and (C) Western blot analysis of osteogenic markers. BMSCs from miR155-KO mice  
659 showed robust osteogenic differentiation potential. (D) ARS images stained at day 10  
660 of culture, (E) ARS quantification, and (F) Western blot analysis of osteogenic  
661 markers. Data are presented as mean $\pm$ SD, n=4. Significant difference compared to  
662 control mice, \*\*\* $p < 0.001$ , \*\*\*\* $p < 0.0001$ .

663 **Figure 6.** miR155 silenced BMSCs showed higher osteogenic differentiation potential.  
664 (A) ARS images stained at 21 days of culture, (B) ARS quantification, (C) miR155  
665 expression level, (D) cell viability, and (E) Western blot analysis. Data are presented  
666 as mean $\pm$ SD. Significant difference compared to negative control, \*\*\* $p < 0.001$ ,  
667 \*\*\*\* $p < 0.0001$ . NC: negative control.

668 **Figure 7.** miR155 targets S1PR1 to regulate osteogenic differentiation of BMSCs. (A)  
669 The TargetScan prediction of miR155 binding site in S1PR1 gene. (B) Luciferase  
670 assay, (C) S1PR1 protein expression in BMSCs, (D) ARS images stained at 21 days of  
671 culture, (E) ARS quantification, (F) Western blot analysis of osteogenic markers, and  
672 (G) cell viability. Data are presented as mean $\pm$ SD. Significant difference compared to  
673 negative control, \* $p < 0.05$ , \*\* $p < 0.001$ .

674 **Figure 8.** Scheme of miR155-mediated regulation of osteogenesis. S1P activates the

675 S1PR1, further increasing Runx2 expression to regulate the osteogenic differentiation  
676 of MSCs into osteoblasts. Finally, activation of S1PR1 signaling increases the bone  
677 mass and may be used as repair of bone defects. miR155 inhibits the process by direct  
678 binding with 3'UTR S1PR1 mRNAs. MSCs: mesenchymal stromal cells.

679

680

681

682

683

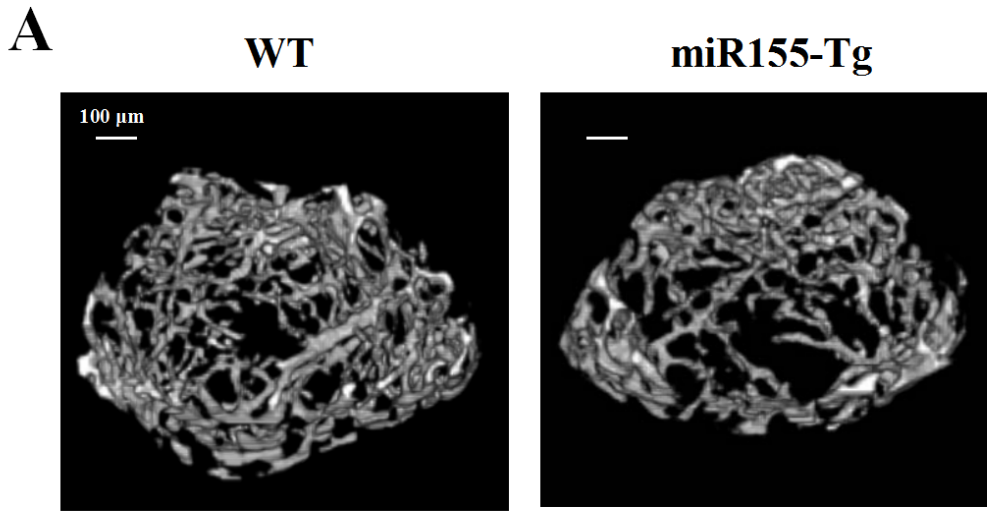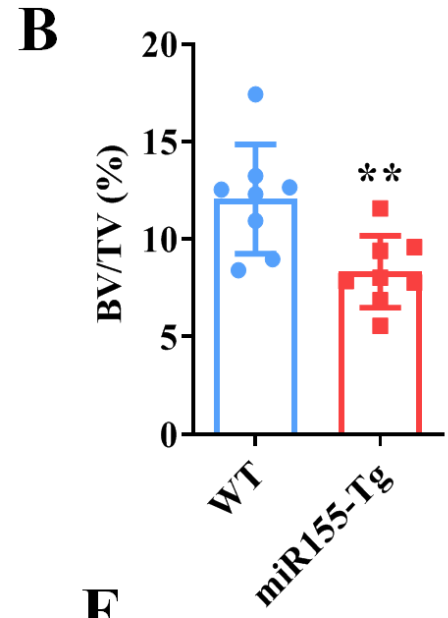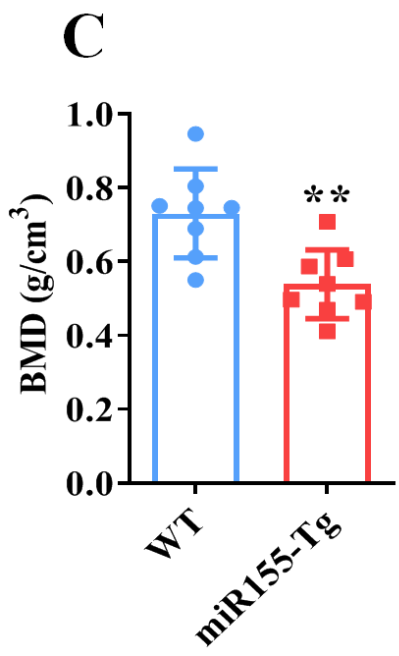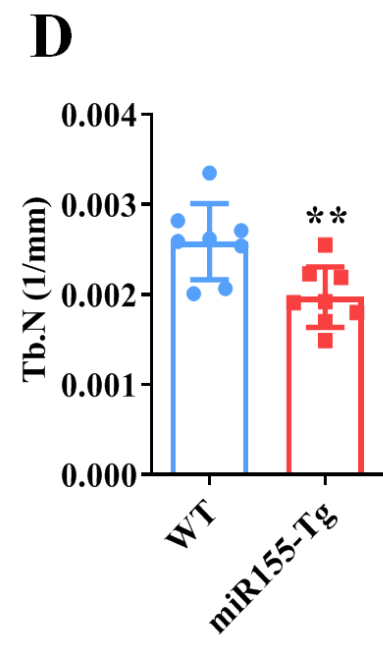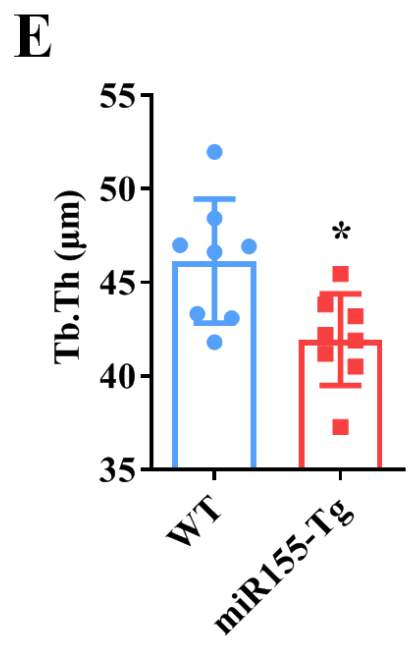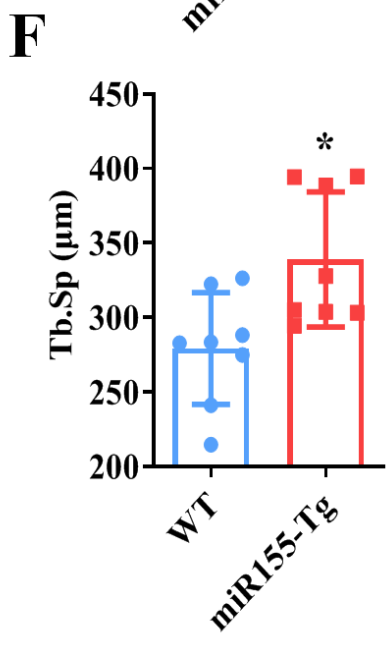

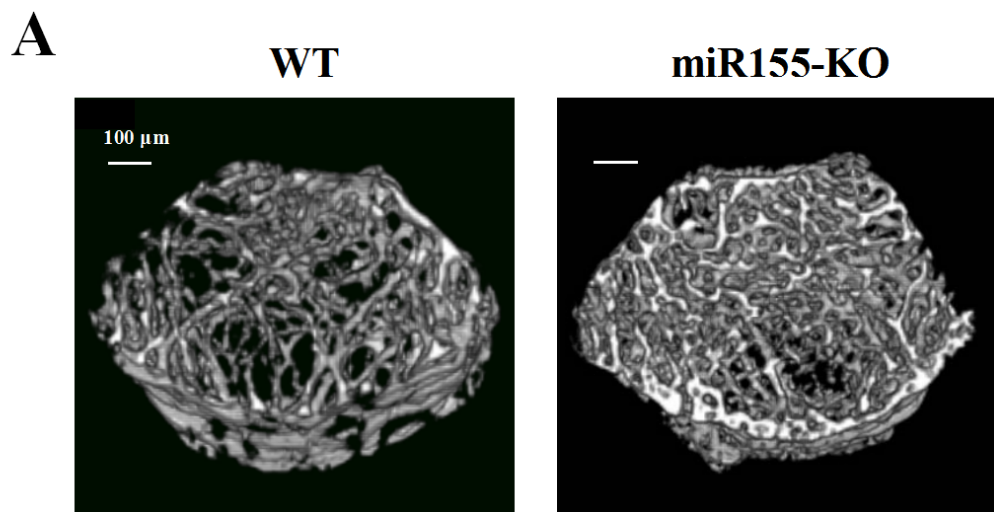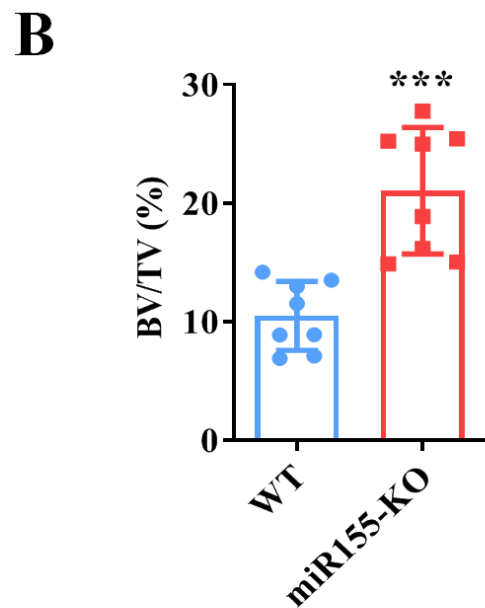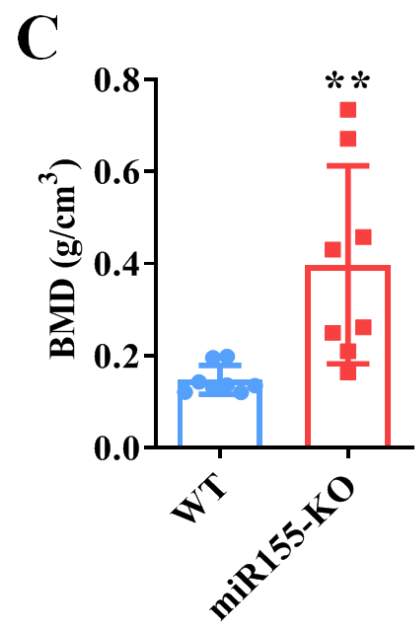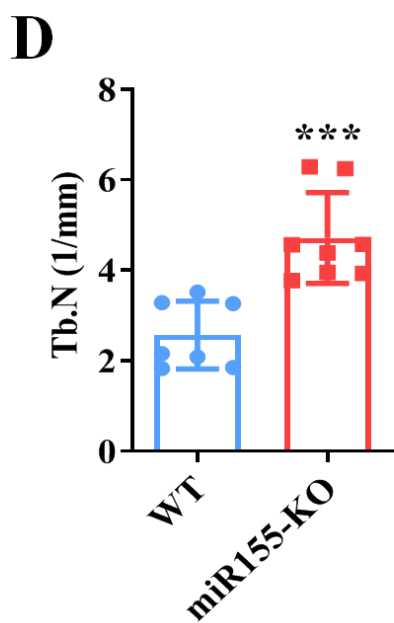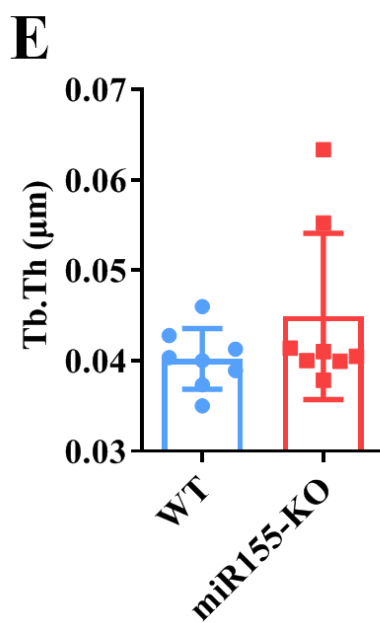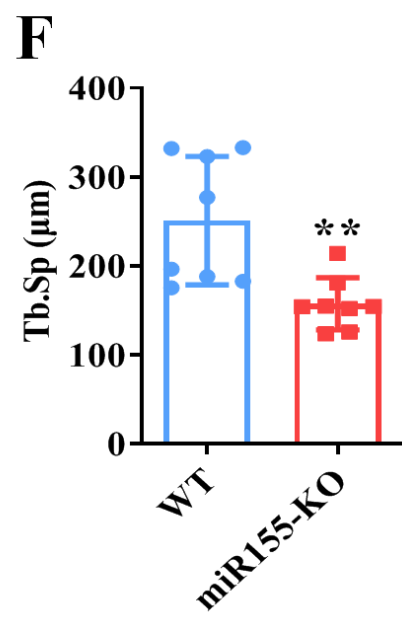

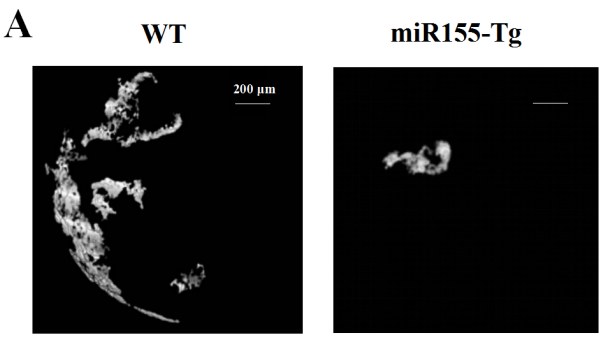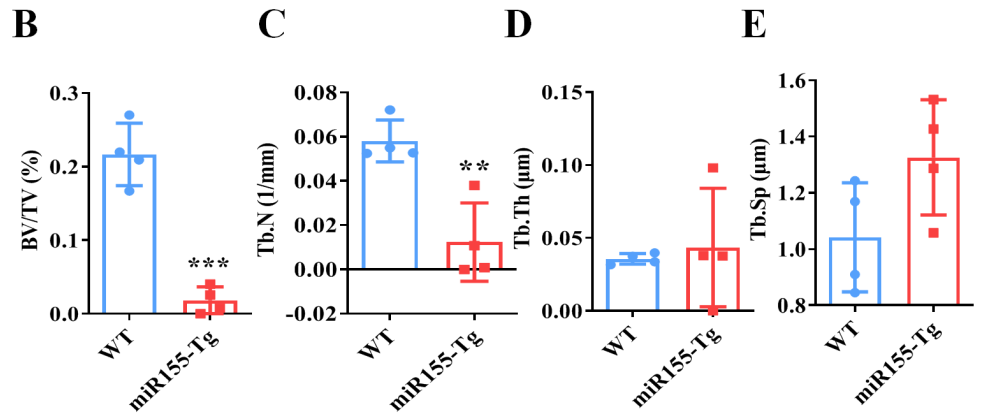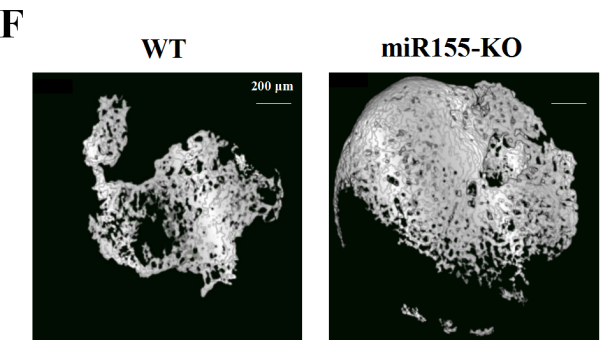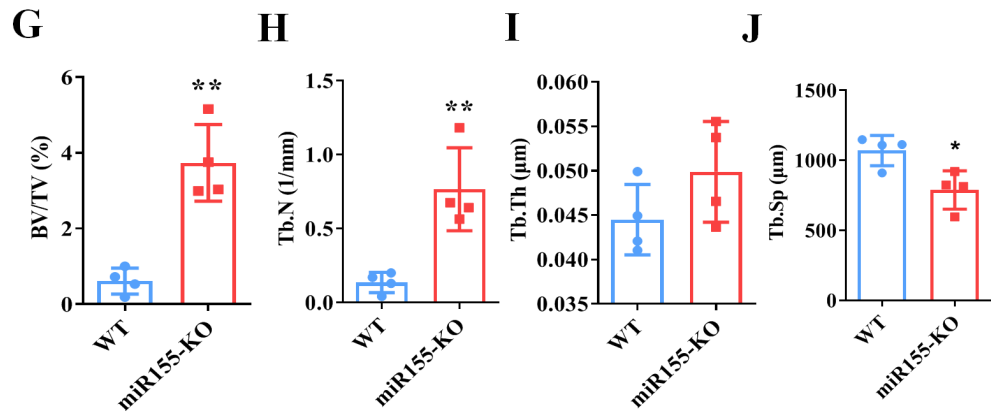

**A**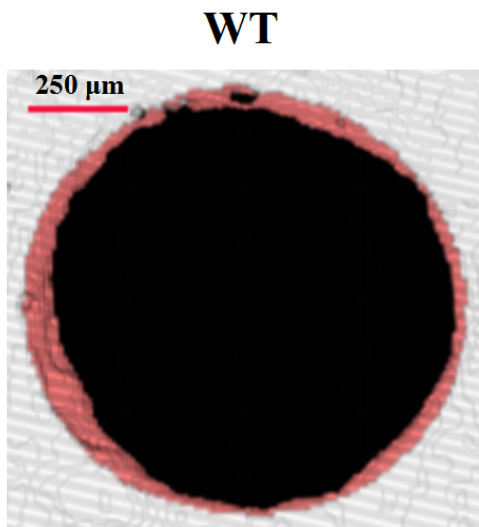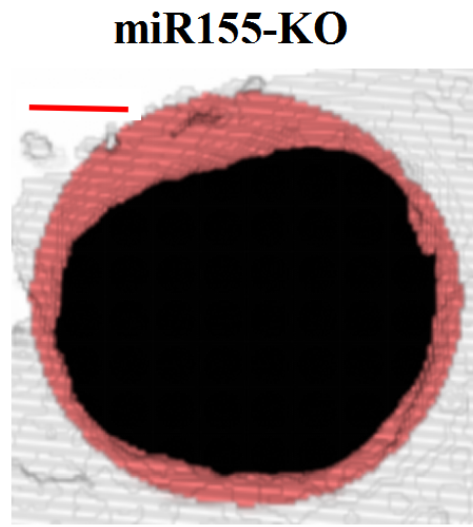**B**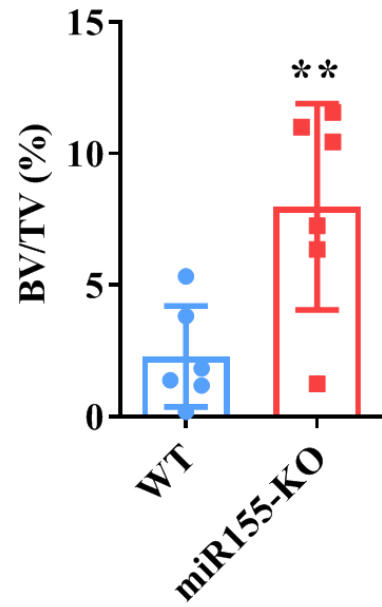**C**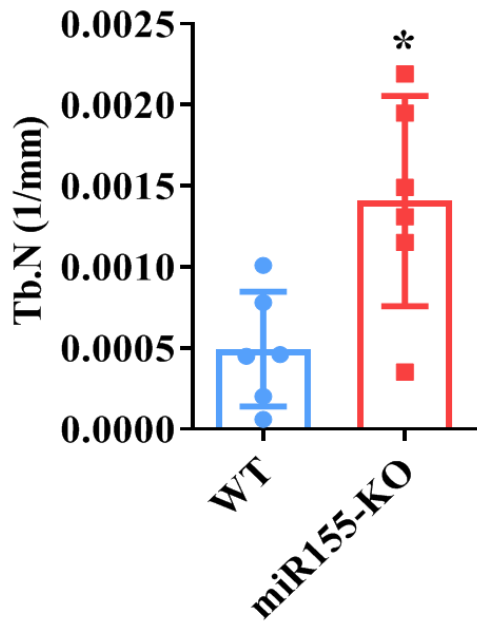**D**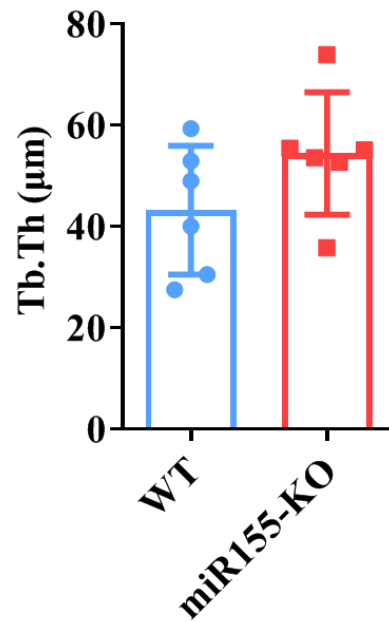**E**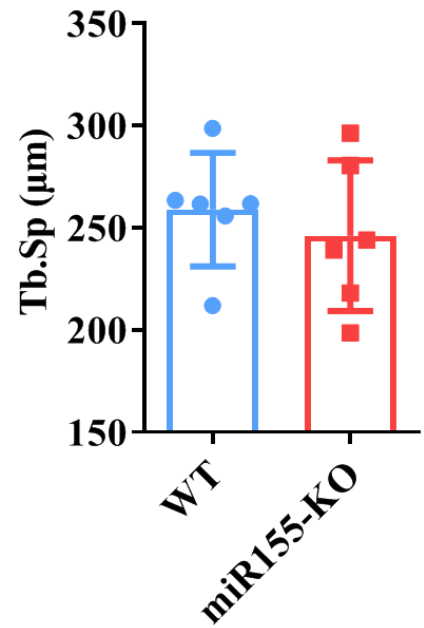

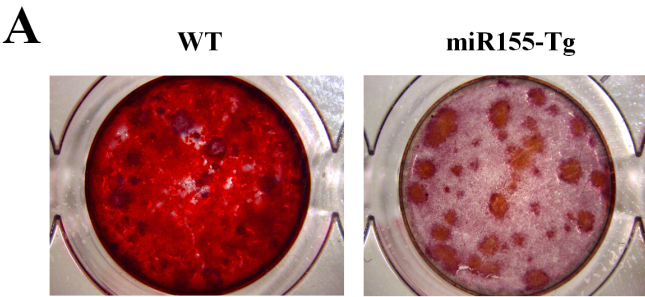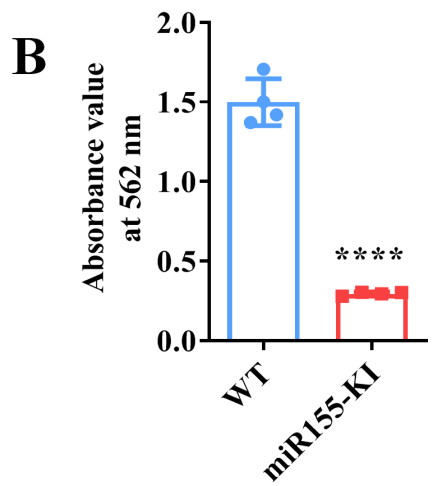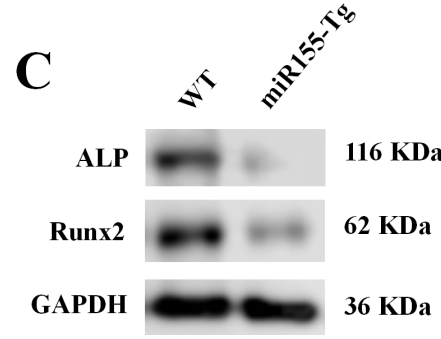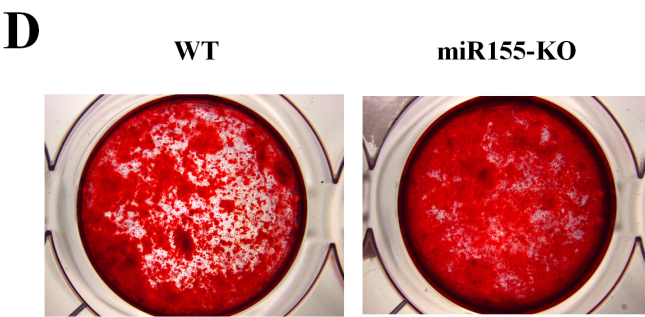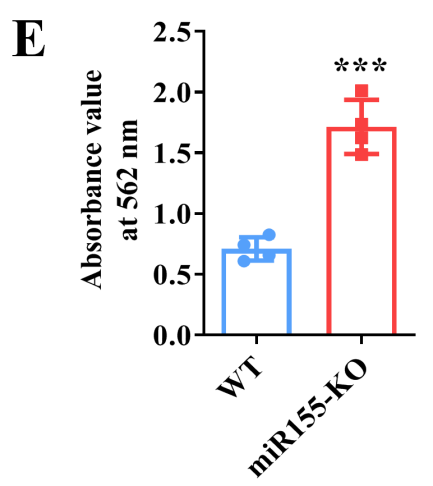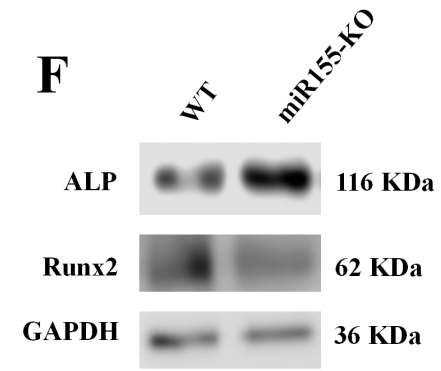

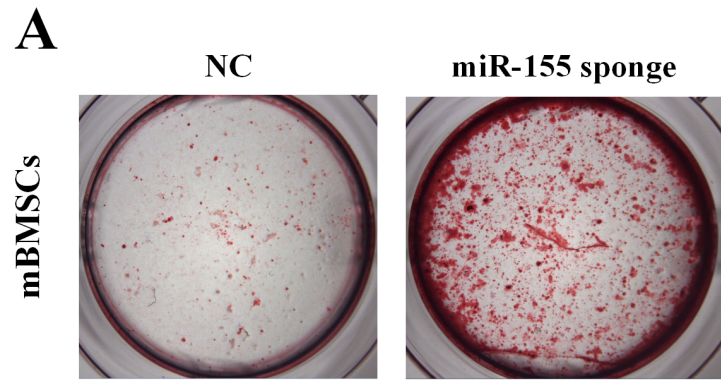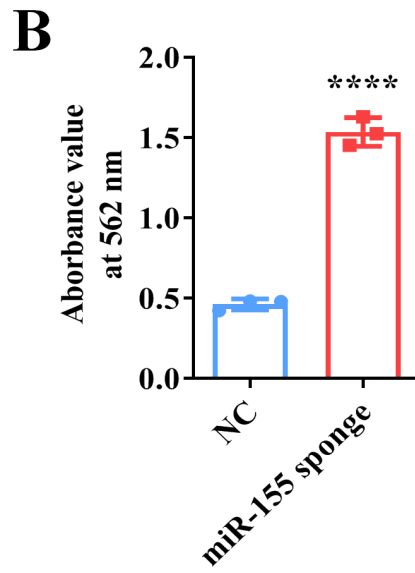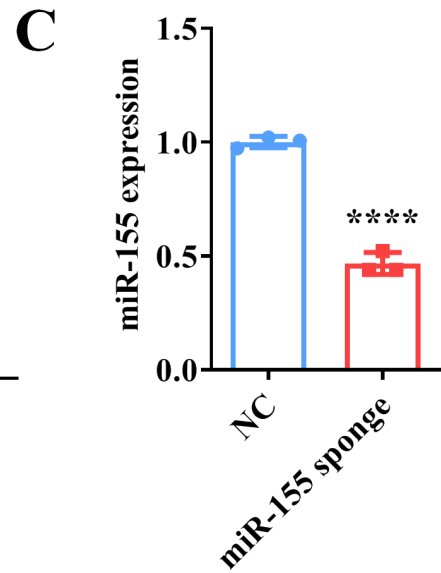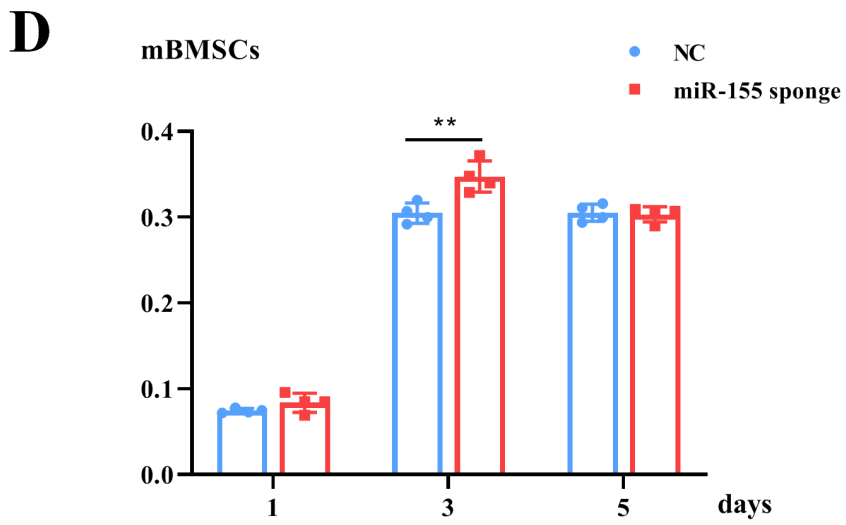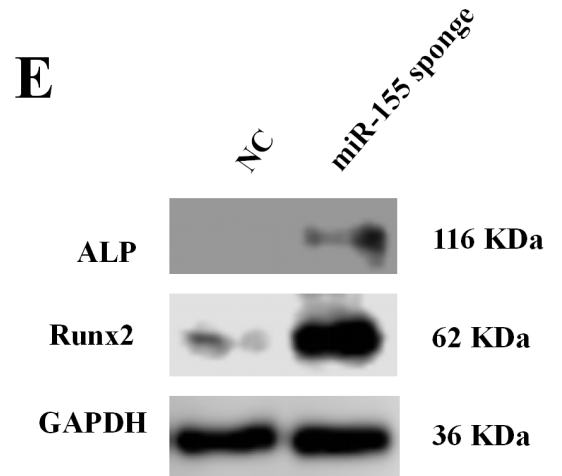



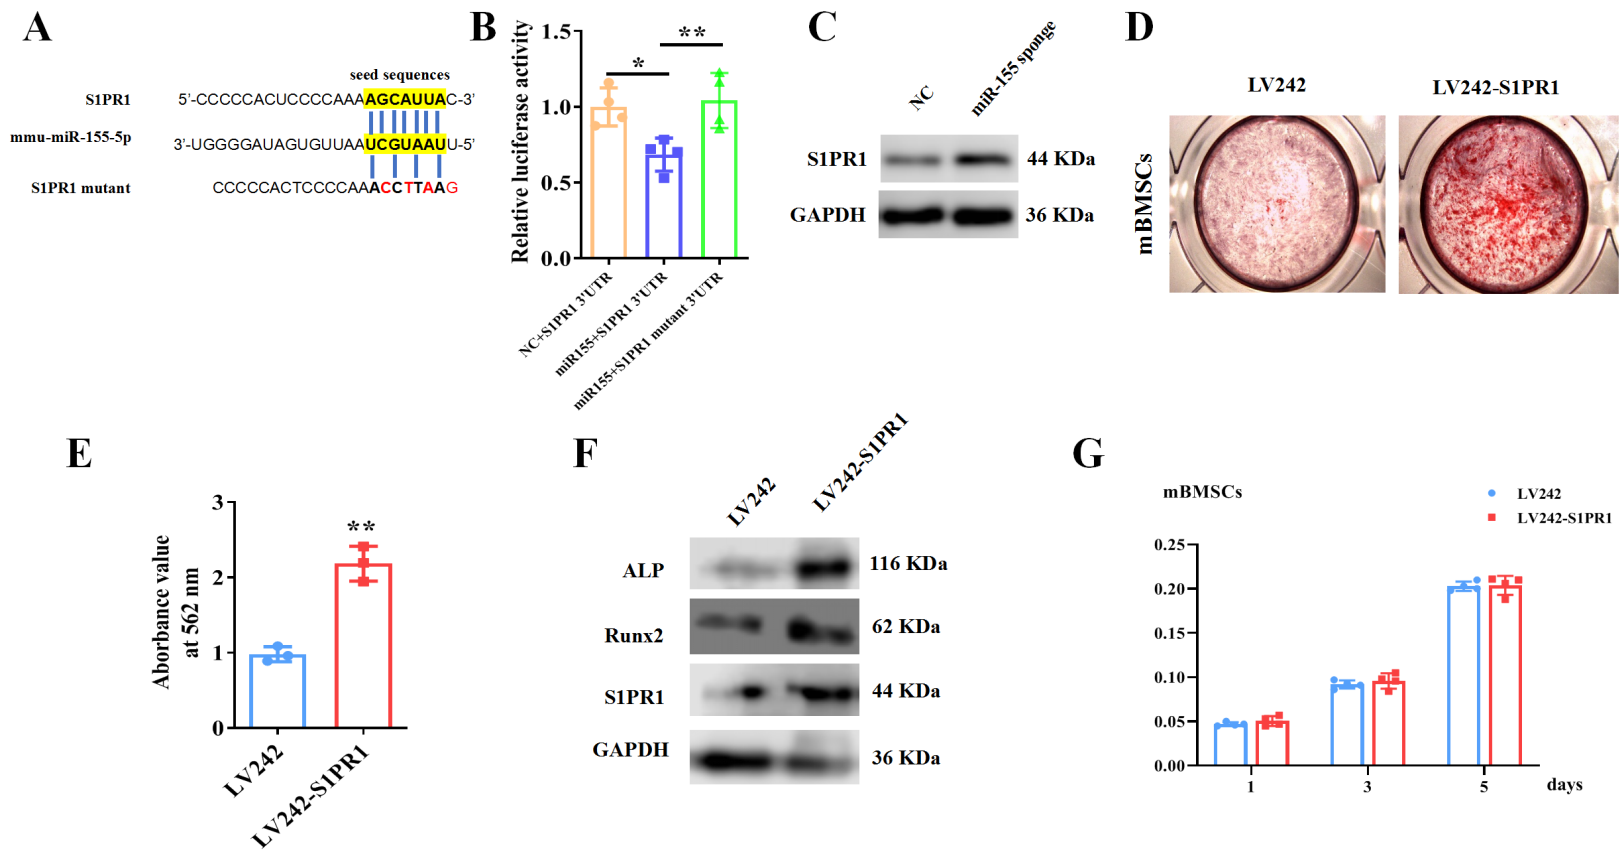

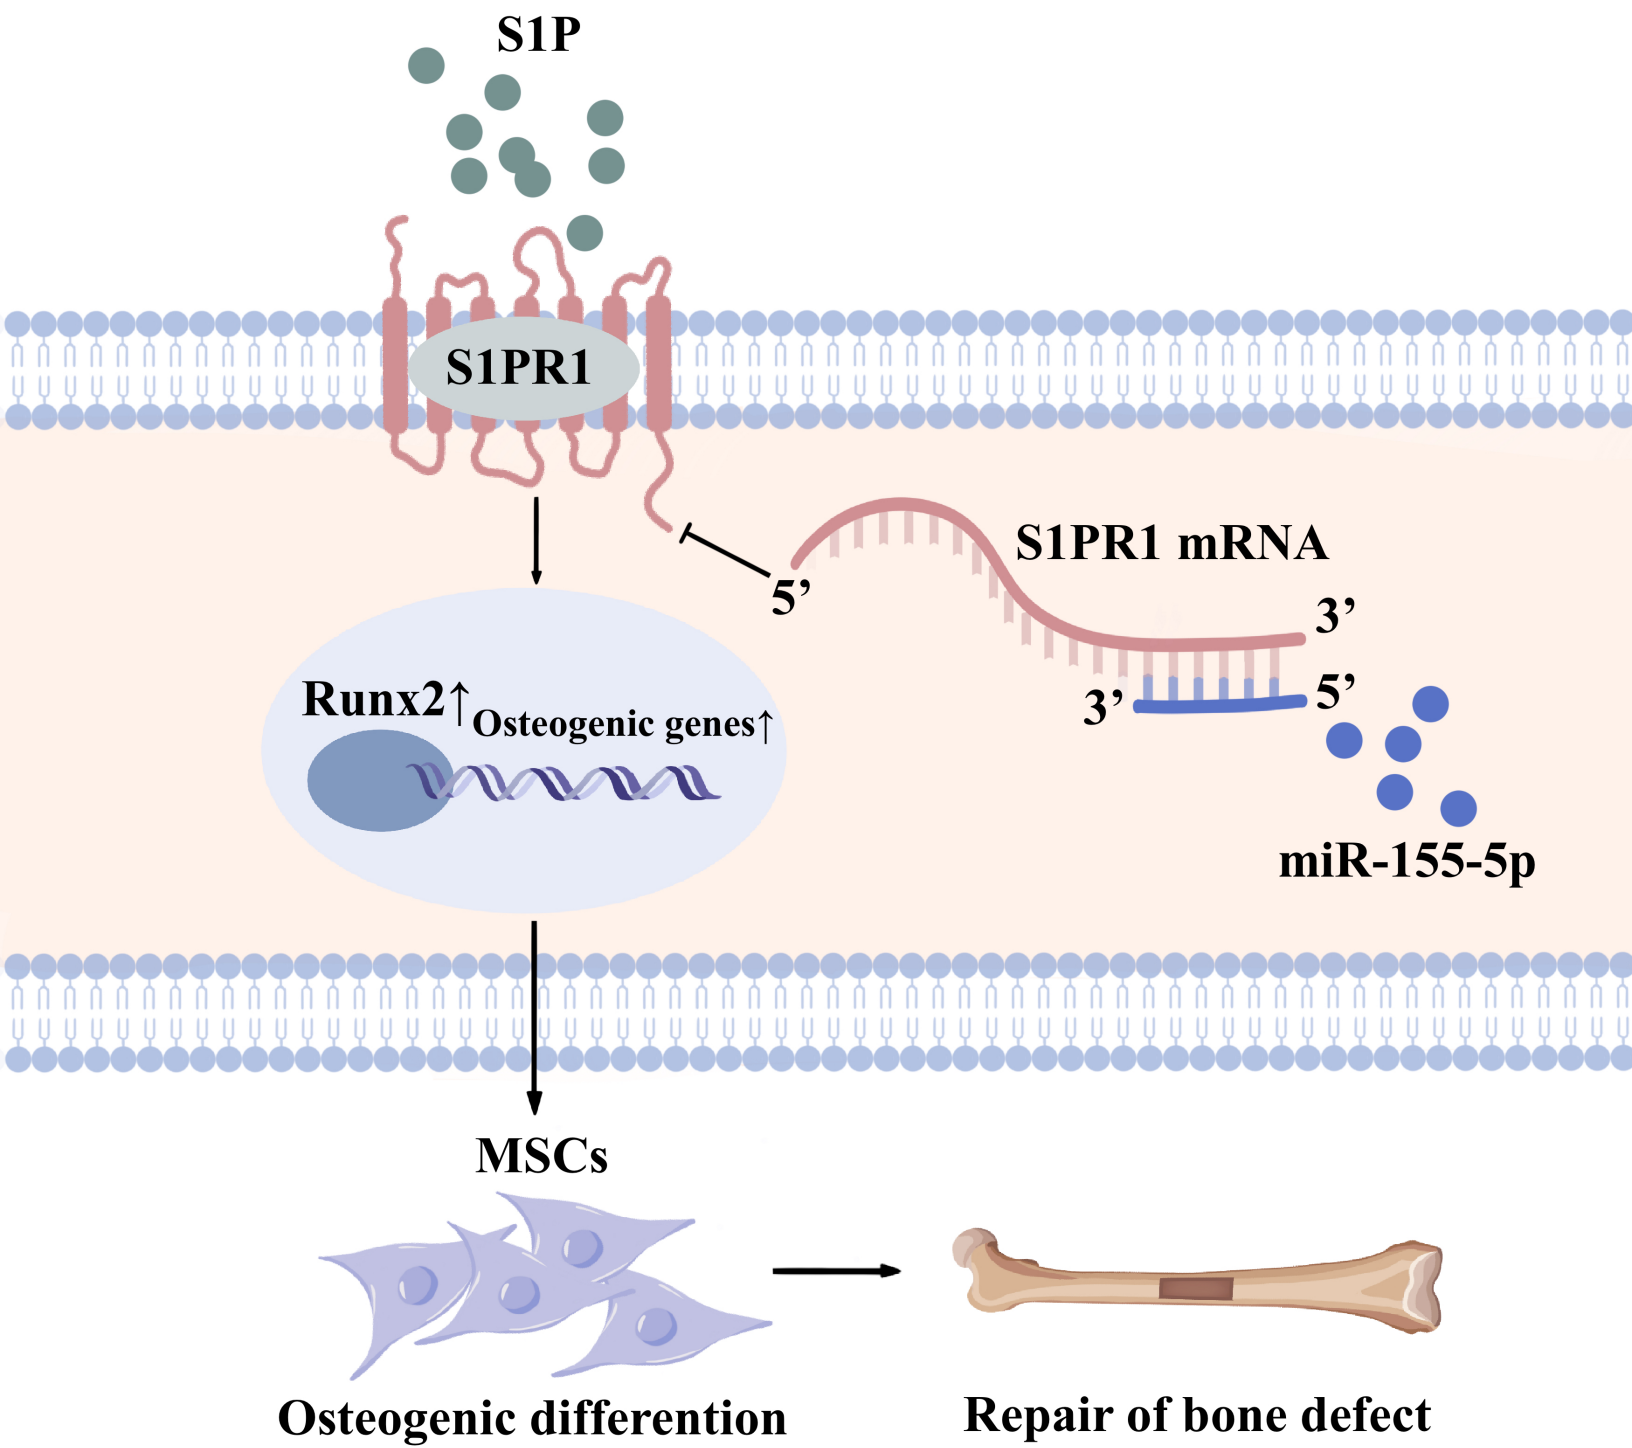

Source: https://www.biorxiv.org/content/10.1101/2022.02.18.480982v1.full.pdf
